# Supplementary material
Source: ML conference proceedings conference paper supplement (https://openreview.net/forum?id=LMotP3zsq_d)
Supplement: supplementary_material [file attachment]

## 1 A Appendix

2 Optionally include extra information (complete proofs, additional experiments and plots) in the  
3 appendix. This section will often be part of the supplemental material.

## 4 B DH-GAN Algorithm

5 In this section, we show the detailed training procedure in summary. As shown in Algorithm 1, before  
6 training adversarially, we pre-train the generator to ensure it can produce reasonable questions. Then  
7 we regard the samples generated by the generator with sampling as negative samples and pre-train  
8 the discriminator.

9 During the DH-GAN’s training process, the generator and discriminator are trained iteratively.  
10 The generator is encouraged to generate deceptive samples to fool the discriminator, while the  
11 discriminator needs to keep pace with the generator.

---

### Algorithm 1 DH-GAN

---

**Input:** Generator  $G$ ; Discriminator  $D$ ; VQG dataset  $\mathcal{S}$

```
1: Pre-train generator  $G$  by  $\mathcal{L}_{sup}$ 
2: for pretrain-discriminator-steps do
3:   Sample  $\mathcal{X}^+ = \{x_1^+, x_2^+, \dots, x_n^+\}$  from dataset  $\mathcal{S}$ 
4:   Generate samples  $\mathcal{X}^- = \{x_1^-, x_2^-, \dots, x_n^-\}$  from generator  $G$ 
5:   Updating discriminator  $D$  by  $\mathcal{L}_D$ 
6: repeat
7:   for generator-steps do
8:     Sample  $\mathcal{X}^+ = \{x_1^+, x_2^+, \dots, x_n^+\}$  from dataset  $\mathcal{S}$ 
9:     Generate samples  $\mathcal{X}^- = \{x_1^-, x_2^-, \dots, x_n^-\}$  from generator  $G$ 
10:    Updating generator  $G$  by  $\mathcal{L}_G$ 
11:   for discriminator-steps do
12:     Sample  $\mathcal{X}^+ = \{x_1^+, x_2^+, \dots, x_n^+\}$  from dataset  $\mathcal{S}$ 
13:     Generate samples  $\mathcal{X}^- = \{x_1^-, x_2^-, \dots, x_n^-\}$  from generator  $G$ 
14:     Updating discriminator  $D$  by  $\mathcal{L}_D$ 
15: until DH-GAN converges
```

---

## 12 C The Details of Double-hints-guided Question Decoder

13 The double-hints-guided question decoder consists of two LSTM: 1) vision LSTM and 2) language  
14 LSTM and a double-hints-guided attention module between them.

15 **Vision LSTM** Technically, at time step  $t$ , we first adopt the vision LSTM to encode the global  
16 visual feature and the input word embedding  $\mathbf{x}_t$  into the hidden state  $\mathbf{h}_1^t \in \mathbb{R}^d$ .  $d$  is the decoder’s  
17 hidden size.

$$\mathbf{h}_1^t = \text{LSTM}(\mathbf{v}_{pool} \parallel \mathbf{x}_t, \mathbf{h}_1^{t-1}), \quad (1)$$

18 where  $\mathbf{v}_{pool} \in \mathbb{R}^d$  is the mean-pooling of the image region features  $\mathbf{V}$ ,  $\mathbf{x}_t$  is the input word’s  
19 embedding vector,  $\parallel$  is the concatenation operation, and  $\mathbf{h}_1^{t-1}$  is the previous step’s hidden state.

20 **Double-hints-guided Attention** The double-hints-guided attention module then dynamically at-  
21 tends on the visual region features with the guidance of double hints. Technically, we first prune the  
22 visual regions by the predicted visual hints and then apply attention by  $\mathbf{h}_1^t$  (textural hint). Therefore,  
23 we define it as follows:

$$\begin{aligned} \mathbf{V}_{vh} &= \text{VisualHintMask}(\mathbf{V}) \\ \mathbf{h}_r &= \text{Attention}(\mathbf{V}_{vh}, \mathbf{h}_1^t) \end{aligned} \quad (2)$$

24 where *VisualHintMask* is to mask off the non-visual-hint objects,  $\mathbf{V}$  is visual regions’ embedding and  
25 *Attention* is the classic attention mechanism [1]. It is worth noting that there is one special case that  
26 no region is predicted as visual hints. We will reveal every region under this condition.

27 **Language LSTM** The language LSTM will encode the vision LSTM’s and double-hints-guided  
28 attention’s results to generate the words.

$$\mathbf{h}_2^t = \text{LSTM}(\mathbf{h}_r \parallel \mathbf{h}_1^t, \mathbf{h}_2^{t-1}) \quad (3)$$

29 where  $\cdot \parallel \cdot$  is the concatenation operation and  $\mathbf{h}_2^{t-1}$  is the previous time step’s hidden state. We project  
30 the  $\mathbf{h}_2^t$  to the vocabulary space with softmax operation to generate the word.

## 31 **D The details of the baseline models**

32 **I2Q** It means generating the questions without any hints. We adopt the classic image caption *show*  
33 *attend and tell* method [12].

34 **IT2Q** It means generating questions with answer types. Technically, we adapt the image caption  
35 model *show attend and tell* [12], which takes the input from the joint embedding of image and answer  
36 type to predict questions with answer-type side information. Since there are no additional answer-type  
37 annotations in the original datasets, we follow [6, 3] and annotate them by hand. We will discuss in  
38 baseline *IMVQG*.

39 **IMVQG [6]** This is a variational baseline that maximizes the mutual information among the  
40 generated questions, the input images, and the expected answers. Note that they annotate 80%  
41 training samples’ answer-type and drop the remain. To fit our training data, for the VQA2.0 dataset,  
42 we annotate training samples’ answer-type, which are missing in their training data, as "other". As for  
43 COCO-QA, we follow [3] and annotate the answer-type by hand since there are only 430 answers.

44 **Dual [7]** This is a competitive baseline that employs dual learning to train the VQG task together  
45 with VQA task. Specifically, they formulate the VQG task as a dual task of VQA task based on  
46 MUTAN architecture and train them by cycle consistency to enhance both the VQG and VQA’s  
47 performance.

48 **Radial [13]** This is a strong baseline for the VQG task, which adopts answers as side information.  
49 Technically, they build the answer-radial object graph and employ GNN based method to learn the  
50 embedding. Then they adopt the graph2seq method to generate the questions.

51 **DH-VQG [3]** This is the latest baseline for VQG with double hints. They propose the rule-based  
52 similarity method to obtain the visual hints. Technically, they first align the visual regions with double  
53 hints and then adopt the graph2seq framework to generate the questions.

## 54 **E Implementation Details**

### 55 **E.1 Dataset and Pre-processing**

#### 56 **E.1.1 Annotating Visual Hints**

57 Following [3], we adopt the rule-based similarity matching technique to obtain visual hints of the  
58 original training samples (a sample refers to an image, a question, and an answer) automatically.  
59 Firstly, we adopt object detection tools [9] to generate  $N$  visual regions. Each region  $r_i \in \mathcal{R}$  is  
60 associated with class attribute and confidence score. Then we use Stanford CoreNLP [8] to find the  
61 noun-words in both questions and answers. The visual regions’ class attributes and noun words are  
62 all initialized by GloVe embedding with mean-pooling. The visual region  $r_i \in \mathcal{R}$  is regarded as a  
63 visual hint iff its’ L2 distance with any noun-words is smaller than the threshold  $\mu$ . We denote the  
64 obtained visual hint candidates set as  $V_{candidate}$ . Examples of generated visual hints are shown in  
65 Fig. I with title: *Raw visual hints w/o. pruning*.

66 When annotating the visual hints by the proposed rule-based similarity matching technique, two  
67 special cases can lead to no matched objects: (1) there are exactly no visual hints (e.g., Q: Is this a  
68 cat? A: No) (2) the error caused by the detection model or the NLP tools leads to no matched visual  
69 hints [3]. Following [3], for the first case, we will keep them. For the second case, we will drop them

70 due to technical drawbacks. What’s more, for an image-answer pair that have multiple questions, we  
 71 will randomly reserve one [3].  
 72 Specifically, we find that there are some class attributes in Visual Genome that can’t be represented  
 73 by GloVe. Thus for each class phrase, we replace it with the closest term in GloVe. Such mapping is  
 74 attached in Table 1.

Table 1: The mapping of class attributes in VG and glove respectively

| Class attribute in VG        | Class attribute in GloVe |
|------------------------------|--------------------------|
| ceiling fan                  | fan                      |
| birthday cake                | cake                     |
| skateboard ramp              | ramp                     |
| towel rack                   | rack                     |
| tree branch                  | branch                   |
| tile floor                   | floor                    |
| ski jacket                   | anorak                   |
| tennis court                 | court                    |
| rock wall                    | wall                     |
| tennis racket,tennis racquet | racquet                  |
| toilet brush                 | brush                    |
| wii remote                   | remote-control           |
| broccoli                     | broccoli                 |
| sandwich                     | sandwich                 |
| skis                         | skis                     |
| kneepad                      | kneecap                  |

### 75 E.1.2 The Details of Visual Hints Pruning

76 Formally, we assume that the region with familiar class (i.e., the class attribute shared by lots of  
 77 regions) but low confidence score is less important and should be pruned. Following this assumption,  
 78 we select at most  $m$  ( $m < |V_{candidate}|$  for most cases) regions as the pruned visual hints (denoted as  
 79  $V$ ) according to the class attributes and the confidence scores as follows:

80 (1) In the beginning, we will choose at most  $m$  the class attributes from the candidates  $V_{candidate}$ .  
 81 First, we sort the candidates by the confidence score in descending order. Second, we scan the  
 82 candidates  $V_{candidate}$  in order and record at most  $m$  class attributes (no repetition). We denote the  
 83 selected classes as  $\mathcal{C}$  (w.r.t  $|\mathcal{C}| \leq m$ ).

84 (2) Then we will select at most  $m$  regions according to the selected classes  $\mathcal{C}$  and the confidence  
 85 score attribute. For each selected class  $c \in \mathcal{C}$ , we will pick out one region with the largest confidence  
 86 score (without replacement). We will repeat this procedure until  $m$  regions are selected. Note that if  
 87  $m \geq |V_{candidate}|$  meets, all visual region candidates are the final visual hints.

### 88 E.1.3 The Details of Pre-processing Images

89 We employ Faster-RCNN [9] with ResNeXt-101 backbone [11] implemented by Detectron2 [10],  
 90 which is pre-trained on Visual Genome [5], to extract visual regions from images. Following the  
 91 previous works<sup>1</sup>, we extract 36 visual regions for all images with different NMS settings.

## 92 E.2 The Setting of Model and Hyper-parameters

93 In the pre-processing, the threshold  $\mu$  is set 5.7 according to [3]. For the visual hints pruning, we set  
 94 the maximum number  $m$  to 4. The word embeddings, whose dimension is set to 512, are initialized  
 95 in random. The hidden size of GRU encoders is also set to 512. The hidden size of the double-hints-  
 96 guided question decoder (both LSTM and attention module) is set to 1024. The unmentioned hidden  
 97 sizes are all set to 1024.

<sup>1</sup>Please refer to the implements.

98 As for the visual hints predictor, we employ 3 layers of the reasoning module. The  $\eta$  and  $\lambda$  in focal  
 99 loss (Eq. 5) are 4 and 2, respectively. The other important hyper-parameters are shown the Table 2  
 100 for both VQA2.0 and COCO-QA datasets.

101 During training, we adopt Adam optimizer [4] for the generator and AdaGrad [2] optimizer for the  
 102 discriminator, respectively. During the pre-training stage, we set the learning rate to 0.0005 for the  
 103 generator and 0.001 for the discriminator. During the DH-GAN’s training process, we set the initial  
 104 learning rate to 0.00001 for both the generator and discriminator. We conduct our experiments on 2  
 105 2080Ti GPUs on a single computer.

Table 2: The details of hyper-parameters for both VQA2.0 and COCO-QA datasets

| Dataset | $\gamma$ | $\tau$ | $\epsilon$ | $\alpha$ | $\beta$ |
|---------|----------|--------|------------|----------|---------|
| VQA2.0  | 0.99     | 0.3    | 0.5        | 0.01     | 0.001   |
| COCO-QA | 0.99     | 0.2    | 0.4        | 0.01     | 0.001   |

## 106 F The Details of Results

107 See Table 3 and Table 4 for full results.

Table 3: Results on VQA2.0 val set. All metrics are in %.

| Method | BLEU@4       | CIDEr         | METEOR       | ROUGE        | SPICE        | F1    |
|--------|--------------|---------------|--------------|--------------|--------------|-------|
| I2Q    | 9.02         | 63.21         | 13.89        | 35.33        | 18.04        | -     |
| IT2Q   | 18.41        | 134.88        | 19.90        | 45.71        | 22.90        | -     |
| IMVQG  | 19.72        | 149.28        | 20.43        | 47.20        | 23.10        | -     |
| Dual   | 19.90        | 151.60        | 20.60        | 47.00        | 23.21        | -     |
| Radial | 21.87        | 162.92        | 22.22        | 48.65        | 25.34        | -     |
| DH-VQG | 22.43        | 180.55        | 22.57        | 49.36        | 27.40        | 50.17 |
| Ours   | <b>23.71</b> | <b>191.06</b> | <b>22.91</b> | <b>50.53</b> | <b>28.18</b> | 51.72 |

Table 4: Results on COCO-QA val set. All metrics are in %.

| Method | BLEU@4       | CIDEr         | METEOR       | ROUGE        | SPICE        | F1    |
|--------|--------------|---------------|--------------|--------------|--------------|-------|
| I2Q    | 14.71        | 107.90        | 13.71        | 38.32        | 18.65        | -     |
| IT2Q   | 18.04        | 135.23        | 17.34        | 46.76        | 22.21        | -     |
| IMVQG  | 21.16        | 156.76        | 18.93        | 46.89        | 24.21        | -     |
| Dual   | 21.48        | 153.32        | 18.93        | 47.03        | 24.34        | -     |
| Radial | 22.63        | 168.29        | 19.73        | 47.71        | 26.71        | -     |
| DH-VQG | 23.15        | 175.18        | 20.04        | 47.84        | 27.63        | 52.24 |
| Ours   | <b>23.52</b> | <b>186.65</b> | <b>20.44</b> | <b>48.61</b> | <b>28.32</b> | 53.40 |

## 108 G More Experimental Results of Hyper-parameters

109 To further study the effect of hyper-parameters, we conduct comprehensive experiments with parame-  
 110 ters varying in a certain range. The results are shown in Fig. 1 and Fig. 2.

- 111 • Firstly, we study the effect of  $\gamma$  balancing the RL loss and teacher-forcing loss in Eq. 14. As  
 112 shown in Fig. 1 (a), the model performs the best when  $\gamma$  is 0.99. Specifically, we observe  
 113 that when  $\gamma$  is 1 (i.e., no teacher forcing loss), the performance drops rapidly, demonstrating  
 114 that the combination of RL loss and teacher forcing loss is effective. And when  $\gamma$  decreases  
 115 from 0.99 to 0.9, we observe that the performance drops. Because when the teacher forcing  
 116 rate is large, the exploration (i.e., the sampling in the RL) is suppressed, which can harm the  
 117 system.

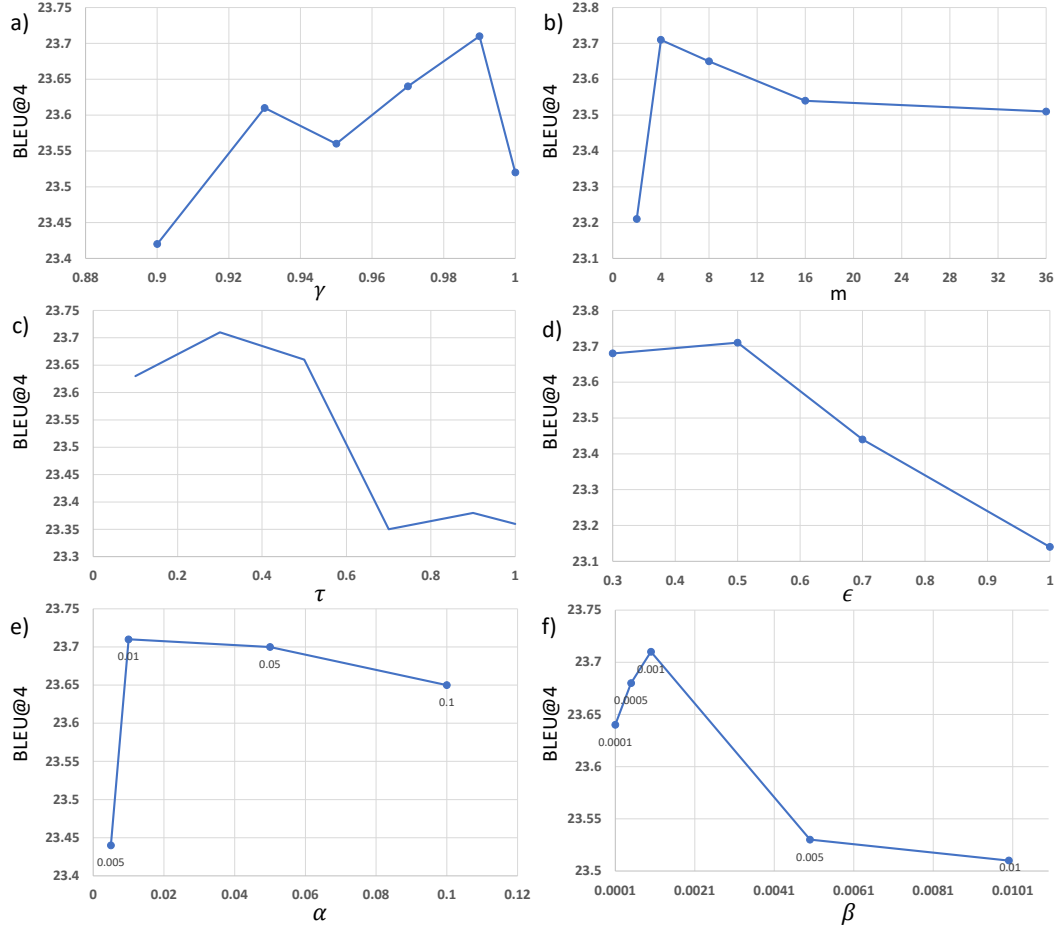

Figure 1: The analysis of different hyper-parameters.

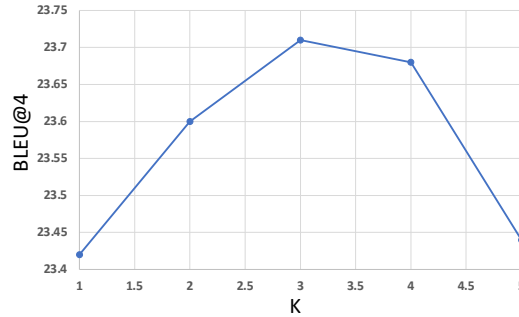

Figure 2: The analysis of parameter K.

- 118
- 119
- 120
- 121
- 122
- 123
- 124
- 125
- Secondly, we study the effectiveness of the visual hints pruning. As shown in Fig. 1 (b), by varying the maximum number of visual hints (i.e.,  $m$ ), we observe that the model performs the best when it is 4. When it is too small, the performance drops rapidly. Because many visual hints which are vital to the VQG may be pruned. When it is too large, the performance also drops because the visual hints are too noisy to guide the question generation procedure faithfully.
  - Thirdly, we study the effect of temperature  $\tau$  in visual hints sampling. As shown in Fig. 1 (c), we observe that the model performs the best when it is 0.3. If  $\tau$  is too large, the

126 distribution of the probability is too soft, which leads to numerous explorations of visual  
127 hints. It can hurt the performance. If the temperature is too small, the distribution becomes  
128 too hard, which can suppress the exploration of visual hints.

129 • Fourthly, we study the effect of  $\epsilon$  in the reward function balancing the *generation quality*  
130 *reward* and the *semantic quality reward* in Eq. 12. As shown in Fig. 1 (d), The model  
131 performs the best when  $\epsilon$  is 0.5.

132 • Fifthly, we study the effect of  $\alpha$  and  $\beta$  balancing the visual hints prediction loss and language  
133 generation loss in Eq. 6 and Eq. 13, respectively. As shown in Fig. 1 (e) and (f), we observe  
134 that the model performs the best when  $\alpha$  is 0.01 and  $\beta$  is 0.001.

135 • Finally, we study the effect of  $K$ , which is the number of modules in visual hints generator.  
136 As shown in Fig. 2, we observe that the model performs the best when  $K$  is 3.

## 137 H The Details of Human Evaluation

138 In this section, we will discuss the detail of human evaluation on the VQA2.0. Following [? 3],  
139 we conduct a small-scale human evaluation on the test split for four systems: 1) the ground truth  
140 results (abbr: GT), 2) our DH-GAN results (abbr: DH-GAN), 3) the generator without GAN's  
141 results (abbr: Generator), 4) the 'Radial' baseline's results (abbr: Radial). We randomly select 50  
142 examples (each example contains the raw image, answer, and question) for each system and ask 5  
143 human evaluators to give feedback on the quality of the randomly selected questions. In each example,  
144 given a triple containing a raw image, a target answer, and an anonymized system's output, they are  
145 asked to rate the quality by answering the following three questions: 1) is the question syntactically  
146 correct? 2) is the question semantically correct? 3) is the question relevant to the image and the  
147 answer pair? For each question, they are asked to rate from 1 to 5. The standard is: 1. Not acceptable,  
148 2. Marginal, 3. Acceptable, 4. Good, 5. Excellent. In practice, we develop software to feed the  
149 examples and collect the evaluation results automatically. The screenshot is attached in Fig. 3.

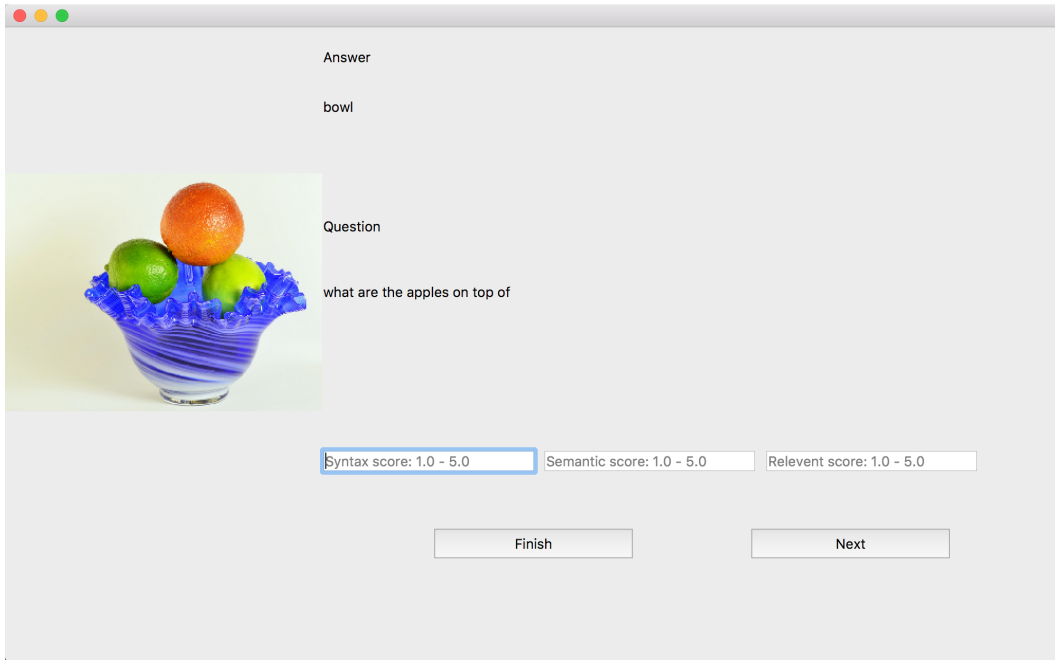

Figure 3: The screenshot of human evaluation software.

## 150 I More Examples of Case Study

151 In this section, we present more qualitative examples in Fig. 4. We compare our model (abbr: Ours)  
152 with other baselines: 1) Radial, 2) generator without DH-GAN (abbr: Generator). Specifically, we  
153 visualize the visual hints (Note that we add the raw visual hints without pruning compared with the  
154 case study in the paper for further illustration): 1) generated by rule-based matching without pruning  
155 (abbr: Raw visual hints w/o. pruning), 2) generated with pre-processing visual hints (abbr: Raw  
156 visual hints, m=4), 3) predicted with only Generator (abbr: Generator), and 4) predicted with full  
157 DH-GAN (abbr: Ours). We can find that our model generates more precise and vivid questions as  
158 well as visual hints. Specifically, we find that the raw visual hints without pruning are quite noisy  
159 (especially in cases b and c), which fail to guide the question generation procedure faithfully. And  
160 the pruned raw visual hints are more referential.

## 161 J The Details of Error Analysis

162 See Fig. 5 for error cases of our results. We present one example of each error reason.

163 **a) Visual hints prediction error.** It means our model predicts the visual hints incorrectly, which  
164 misleads the question generation procedure. The answer "girl" refers to the child holding by the man,  
165 but the model misses the correct region representing the "girl". Actually, the model predicts the visual  
166 hints representing other men and asks the wrong question.

167 **b) Detection error.** It means our model recognizes the objects in the image by mistake. In the  
168 image, the woman is riding the tricycle. However, our model recognizes it as "bike" incorrectly.

169 **c) Reasoning error.** It means that our model makes wrong logical reasoning. In the picture, the  
170 apple is actually ripe. However, the expected answer is "no".

171 **d) Syntactic error.** It means our model generates syntactically incorrect questions. The 'What  
172 expression ... wearing' is incorrect.

## 173 Checklist

174 The checklist follows the references. Please read the checklist guidelines carefully for information on  
175 how to answer these questions. For each question, change the default **[TODO]** to **[Yes]**, **[No]**, or  
176 **[N/A]**. You are strongly encouraged to include a **justification to your answer**, either by referencing  
177 the appropriate section of your paper or providing a brief inline description.

178 Please do not modify the questions and only use the provided macros for your answers. Note that the  
179 Checklist section does not count towards the page limit. In your paper, please delete this instructions  
180 block and only keep the Checklist section heading above along with the questions/answers below.

181 1. For all authors...

182 (a) Do the main claims made in the abstract and introduction accurately reflect the paper's  
183 contributions and scope? **[Yes]**

184 (b) Did you describe the limitations of your work? **[Yes]** See Sec. 3.3 and Appendix J

185 (c) Did you discuss any potential negative societal impacts of your work? **[No]**

186 (d) Have you read the ethics review guidelines and ensured that your paper conforms to  
187 them? **[Yes]**

188 2. If you are including theoretical results...

189 (a) Did you state the full set of assumptions of all theoretical results? **[N/A]**

190 (b) Did you include complete proofs of all theoretical results? **[N/A]**

191 3. If you ran experiments...

192 (a) Did you include the code, data, and instructions needed to reproduce the main experi-  
193 mental results (either in the supplemental material or as a URL)? **[Yes]**

- 194 (b) Did you specify all the training details (e.g., data splits, hyperparameters, how they  
195 were chosen)? [Yes] See Appendix E.2
- 196 (c) Did you report error bars (e.g., with respect to the random seed after running experi-  
197 ments multiple times)? [No]
- 198 (d) Did you include the total amount of compute and the type of resources used (e.g., type  
199 of GPUs, internal cluster, or cloud provider)? [Yes] See Appendix E.2
- 200 4. If you are using existing assets (e.g., code, data, models) or curating/releasing new assets...
- 201 (a) If your work uses existing assets, did you cite the creators? [Yes]
- 202 (b) Did you mention the license of the assets? [Yes]
- 203 (c) Did you include any new assets either in the supplemental material or as a URL? [Yes]
- 204 (d) Did you discuss whether and how consent was obtained from people whose data you're  
205 using/curating? [N/A] The data we use is open for researchers.
- 206 (e) Did you discuss whether the data you are using/curating contains personally identifiable  
207 information or offensive content? [No]
- 208 5. If you used crowdsourcing or conducted research with human subjects...
- 209 (a) Did you include the full text of instructions given to participants and screenshots, if  
210 applicable? [Yes] See Appendix H
- 211 (b) Did you describe any potential participant risks, with links to Institutional Review  
212 Board (IRB) approvals, if applicable? [No]
- 213 (c) Did you include the estimated hourly wage paid to participants and the total amount  
214 spent on participant compensation? [Yes] Yes. We have paid the participants.



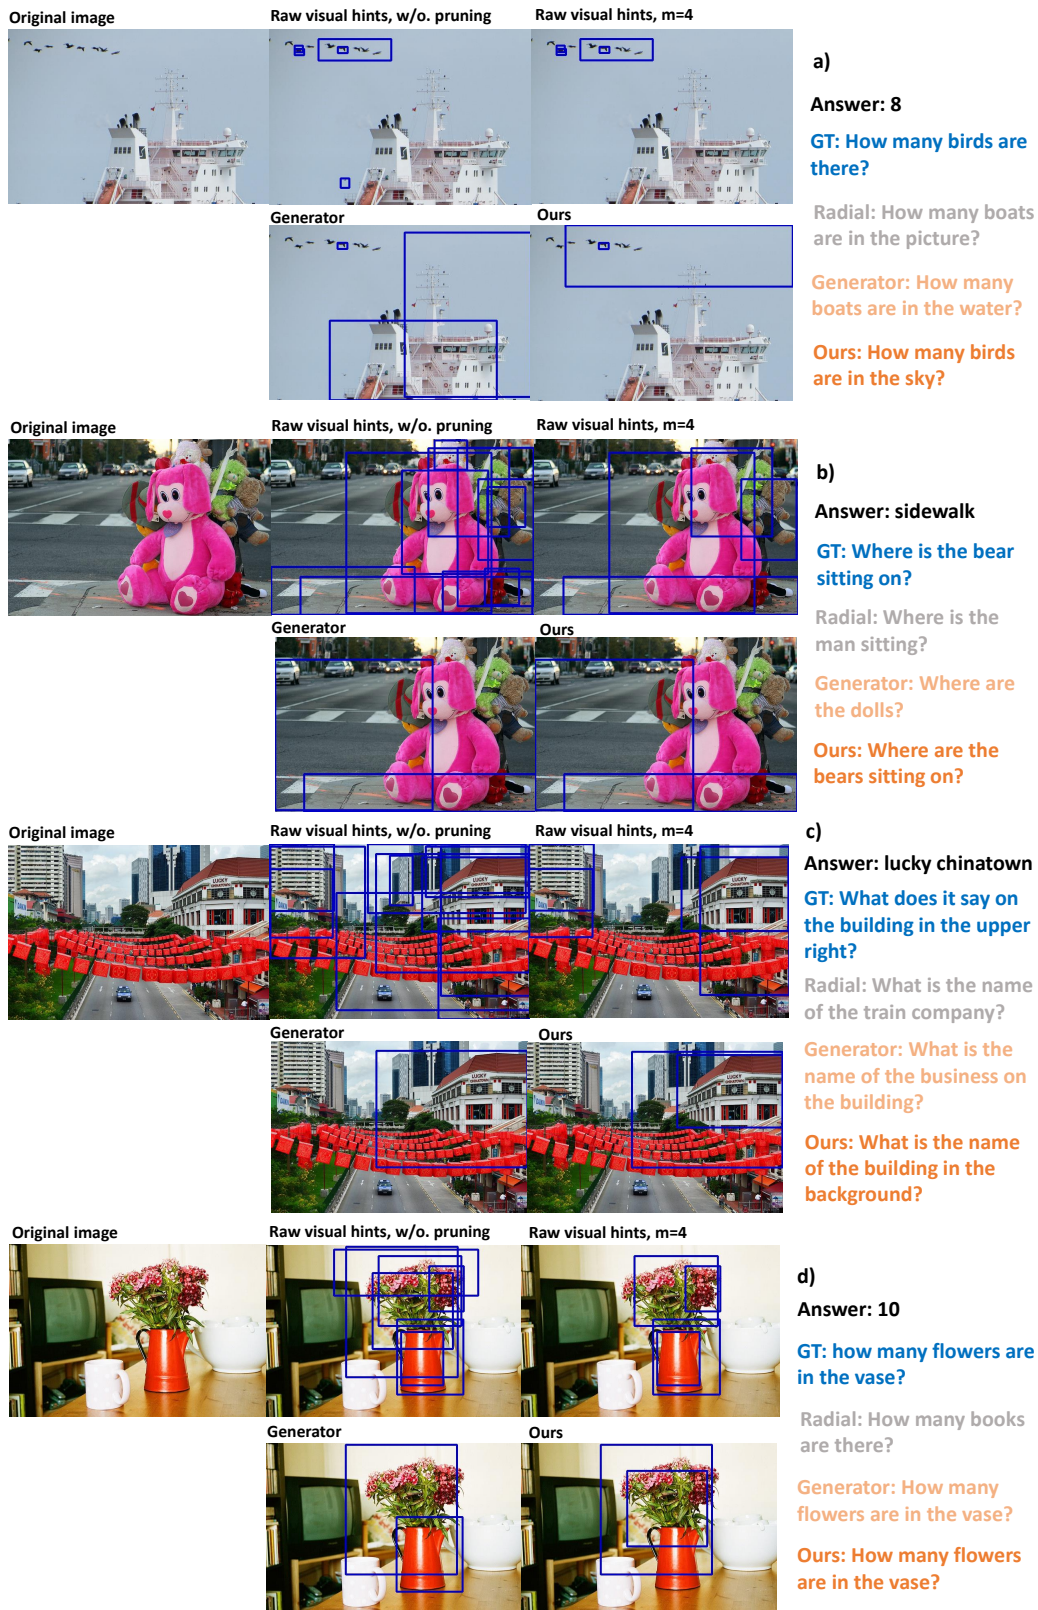

Figure 4: The details of case study examples. The blue rectangles mean the visual-hint regions.

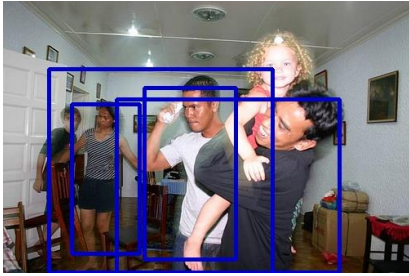

a)

**Visual Hints Prediction Error**

**Answer: girl**

**Question: Who is wearing a tie?**

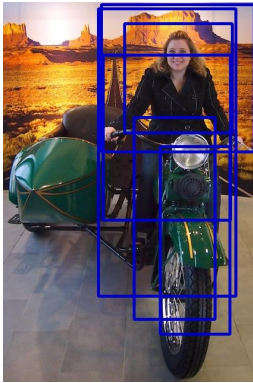

b)

**Detection Error**

**Answer: woman**

**Question: Who is riding the **bike** ?**

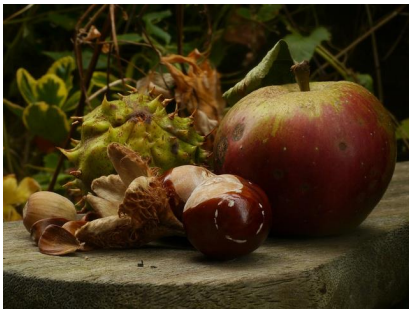

c)

**Reasoning Error**

**Answer: no**

**Question: Is the apple ripe ?**

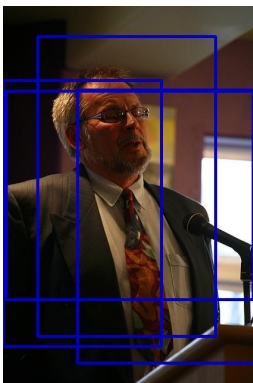

d)

**Syntactic Error**

**Answer: serious**

**Question: What expression is this man wearing ?**

Figure 5: The details of error examples. The blue rectangles are the predicted visual hints by our model.

215 **References**

- 216 [1] Dzmitry Bahdanau, Kyunghyun Cho, and Yoshua Bengio. Neural machine translation by jointly  
217 learning to align and translate. *arXiv preprint arXiv:1409.0473*, 2014.
- 218 [2] John Duchi, Elad Hazan, and Yoram Singer. Adaptive subgradient methods for online learning  
219 and stochastic optimization. *Journal of machine learning research*, 12(7), 2011.
- 220 [3] Shen Kai, Lingfei Wu, Siliang Tang, Fangli Xu, Zhu Zhang, Yu Qiang, and Yueting Zhuang.  
221 Ask question with double hints: Visual question generation with answer-awareness and region-  
222 reference, 2021. URL <https://openreview.net/forum?id=-WwaX9vKKt>.
- 223 [4] Diederik P Kingma and Jimmy Ba. Adam: A method for stochastic optimization. *arXiv preprint*  
224 *arXiv:1412.6980*, 2014.
- 225 [5] Ranjay Krishna, Yuke Zhu, Oliver Groth, Justin Johnson, Kenji Hata, Joshua Kravitz, Stephanie  
226 Chen, Yannis Kalantidis, Li-Jia Li, David A Shamma, et al. Visual genome: Connecting  
227 language and vision using crowdsourced dense image annotations. *International journal of*  
228 *computer vision*, 123(1):32–73, 2017.
- 229 [6] Ranjay Krishna, Michael Bernstein, and Li Fei-Fei. Information maximizing visual question  
230 generation. In *Proceedings of the IEEE/CVF Conference on Computer Vision and Pattern*  
231 *Recognition*, pages 2008–2018, 2019.
- 232 [7] Yikang Li, Nan Duan, Bolei Zhou, Xiao Chu, Wanli Ouyang, Xiaogang Wang, and Ming Zhou.  
233 Visual question generation as dual task of visual question answering. In *Proceedings of the*  
234 *IEEE Conference on Computer Vision and Pattern Recognition*, pages 6116–6124, 2018.
- 235 [8] Christopher D. Manning, Mihai Surdeanu, John Bauer, Jenny Finkel, Steven J. Bethard, and  
236 David McClosky. The Stanford CoreNLP natural language processing toolkit. In *Association*  
237 *for Computational Linguistics (ACL) System Demonstrations*, pages 55–60, 2014. URL <http://www.aclweb.org/anthology/P/P14/P14-5010>.
- 239 [9] Shaoqing Ren, Kaiming He, Ross Girshick, and Jian Sun. Faster r-cnn: Towards real-time  
240 object detection with region proposal networks. *arXiv preprint arXiv:1506.01497*, 2015.
- 241 [10] Yuxin Wu, Alexander Kirillov, Francisco Massa, Wan-Yen Lo, and Ross Girshick. Detectron2.  
242 <https://github.com/facebookresearch/detectron2>, 2019.
- 243 [11] Saining Xie, Ross Girshick, Piotr Dollár, Zhuowen Tu, and Kaiming He. Aggregated residual  
244 transformations for deep neural networks. In *Proceedings of the IEEE conference on computer*  
245 *vision and pattern recognition*, pages 1492–1500, 2017.
- 246 [12] Kelvin Xu, Jimmy Ba, Ryan Kiros, Kyunghyun Cho, Aaron Courville, Ruslan Salakhudinov,  
247 Rich Zemel, and Yoshua Bengio. Show, attend and tell: Neural image caption generation with  
248 visual attention. In *International conference on machine learning*, pages 2048–2057, 2015.
- 249 [13] Xing Xu, Tan Wang, Yang Yang, Alan Hanjalic, and Heng Tao Shen. Radial graph convolutional  
250 network for visual question generation. *IEEE Transactions on Neural Networks and Learning*  
251 *Systems*, 2020.
